# Supplementary material for: ZELDA: A 3D Image Segmentation and Parent-Child Relation Plugin for Microscopy Image Analysis in napari
Source: Frontiers journal article supplement (doi:10.3389/fcomp.2021.796117), 2022-01-04
Supplement: Image_2.pdf [file Image_2.pdf]

**A**

| Parent_label | Area    | Equivalent_diameter | MFI         |
|--------------|---------|---------------------|-------------|
| 4            | 61524   | 44.50092806         | 21400.02779 |
| 6            | 51327   | 41.89248994         | 22328.22453 |
| 0            | 99      | 5.214739423         | 19818.31818 |
| 5            | 7704    | 22.263476           | 20383.78855 |
| 5            | 7771.5  | 22.32830885         | 20670.41228 |
| 4            | 74502   | 47.43259198         | 24658.9672  |
| 5            | 99049.5 | 52.15608401         | 24016.61083 |
| 5            | 56317.5 | 43.20844824         | 22260.36548 |
| 1            | 73584   | 47.23696771         | 24755.67967 |
| 6            | 77463   | 48.05283162         | 25165.21064 |
| 5            | 13725   | 26.98930273         | 22365.67377 |

**B**

```

-> GB: sigma=1.0
-> Th=0.5
-> DistMap
-> Maxima: min_dist=1
-> Found n=7 objects

```

**Supplementary Figure 2. ZELDA result table and log file.** (A) Example of exported results table for the “Segment two populations and relate” protocol. The table includes the original label of the children population, the parent identifier, and the measured properties such as the Area, the Equivalent diameter, and the Mean Fluorescence Intensity (MFI). (B) A log file is saved as .txt at the end of the segmentation protocols.
