# Supplementary material for: ZELDA: A 3D Image Segmentation and Parent-Child Relation Plugin for Microscopy Image Analysis in napari
Source: Frontiers journal article supplement (doi:10.3389/fcomp.2021.796117), 2022-01-04
Supplement: Image_3.pdf [file Image_3.pdf]

A

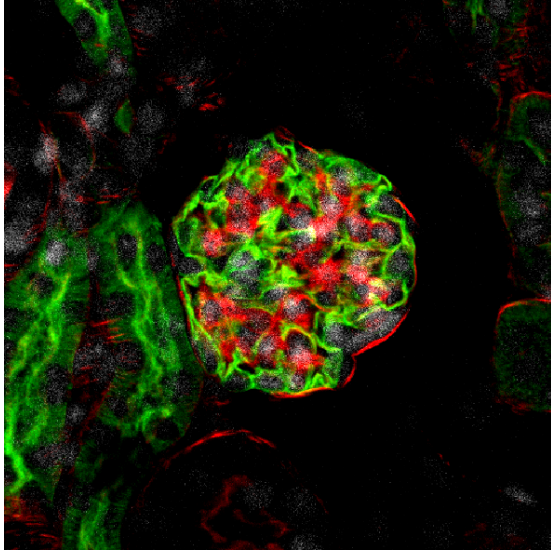

B

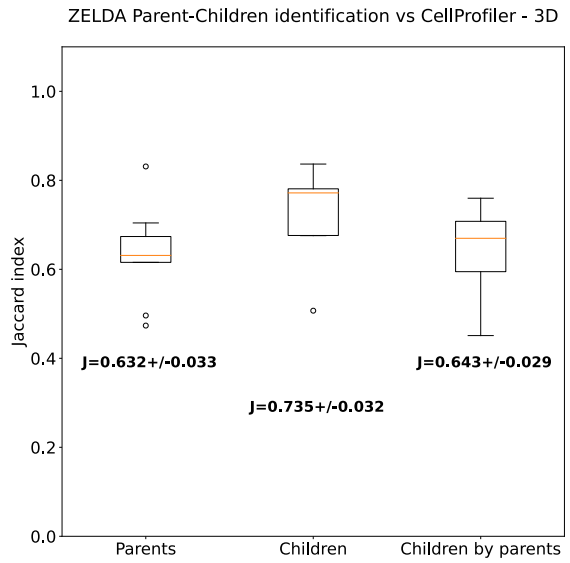

C

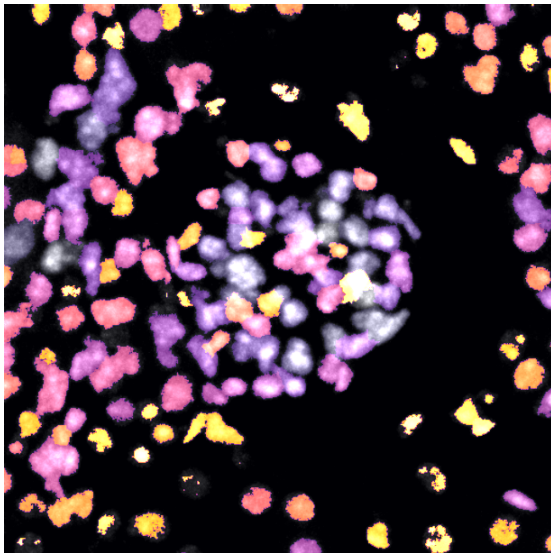

D

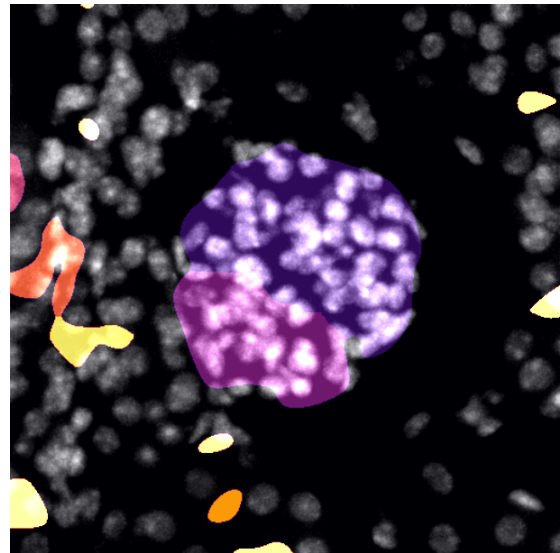

**Supplementary Figure 3. Improved Cell Profiler segmentation by pre-processing 3D data sets with ZELDA.** (A) Mid-slice of the z-stack, where typically the strongest signal is found. Its segmentation with ZELDA and CellProfiler provide a higher Jaccard score. (B) Jaccard index for the results of the ZELDA 3D segmentation and a CellProfiler pipeline composed solely of 3D compatible modules. Improved (C) segmentation of children nuclei and (D) “parent-child” relation obtained by CellProfiler using 3D pre-processed data sets from ZELDA.
